# Supplementary material
Source: publisher site journal article supplement (https://www.kjim.org/upload/media/kjim-2022-173-suppl3.pdf)

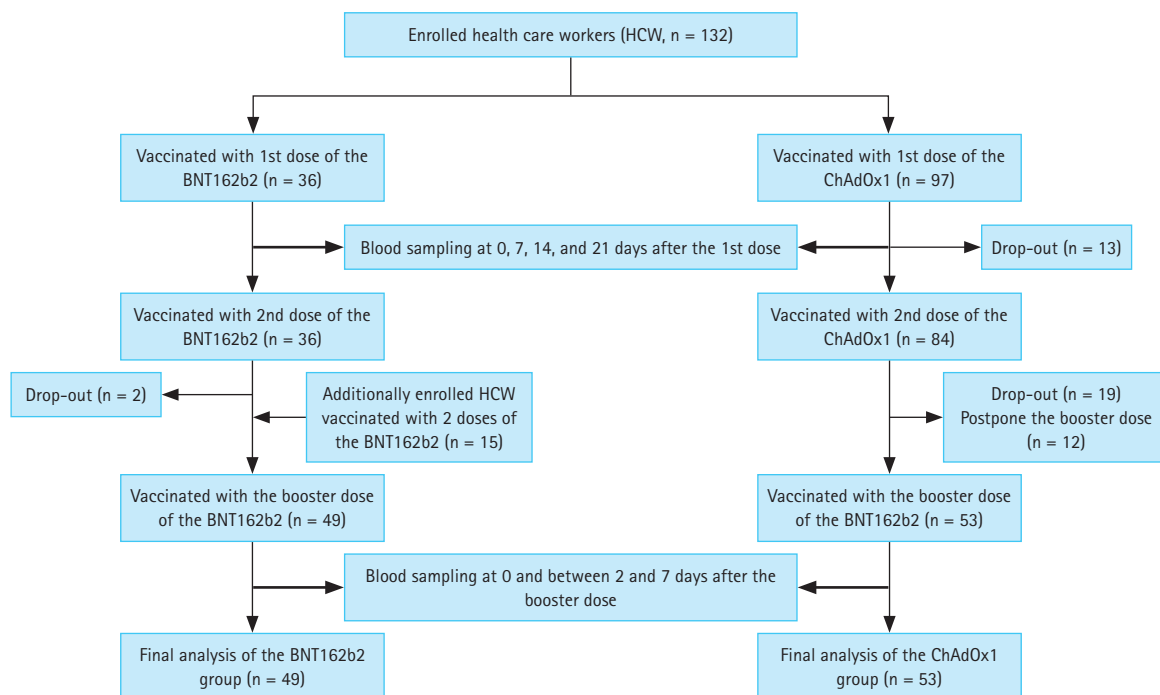

**Supplementary Figure 2.** Study flow chart.

Supplement: Supplementary file 1 [file kjim-2022-173-suppl3.pdf]
